# Supplementary material
Source: PubMed Central journal article supplement (PMC7275135)
Supplement: 253_2020_10685_MOESM1_ESM.pdf [file 253_2020_10685_MOESM1_ESM.pdf]

1 **Applied Microbiology and Biotechnology**  
2 **Supplementary Material**

3 **Therapeutic potential of a designed CS $\alpha$  peptide ID13 in *Staphylococcus aureus*-induced endometritis of mice**

4 **Bing Li<sup>1,2\*</sup> · Na Yang<sup>1,2\*</sup> · Yuxue Shan<sup>1,2,3\*</sup> · Xiumin Wang<sup>1,2</sup> · Ya Hao<sup>1,2</sup> · Ruoyu Mao<sup>1,2\*\*</sup> · Da Teng<sup>1,2\*\*</sup> · Huan**  
5 **Fan<sup>3</sup> · Jianhua Wang<sup>1,2\*\*</sup>**

6 <sup>1</sup> Gene Engineering Lab, Feed Research Institute, Chinese Academy of Agricultural Science, Beijing 100081, P. R. China

7 <sup>2</sup> Key Laboratory of Feed Biotechnology, Ministry of Agriculture and Rural Affairs, Beijing 100081, P. R. China

8 <sup>3</sup> Tianjin Animal Science and Veterinary Research Institute, Tianjin 300381, P. R. China

9 \* These three authors Bing Li, Na Yang and Yuxue Shan contributed equally into this paper.

10 \*\* Correspondence should be addressed to:

11 (A) Outstanding Prof., Ph.D., PI. and Director Jianhua Wang:

12 Team of Alternatives to Antibiotics, Gene Engineering Laboratory, Feed Research Institute, Chinese Academy of  
13 Agricultural Sciences, Beijing 100081, People's Republic of China

14 E-mail address: wangjianhua@caas.cn; 2681298635@qq.com

15 Phone: 0086-10-82106081

16 (B) Professor Ph.D., Da Teng, and her email address: [tengda@caas.cn](mailto:tengda@caas.cn)

17 (C) A/C professor Ph.D., Ruoyu Mao, and his email address: [maoruoyu@caas.cn](mailto:maoruoyu@caas.cn)

18

19 **Supplementary Figures**

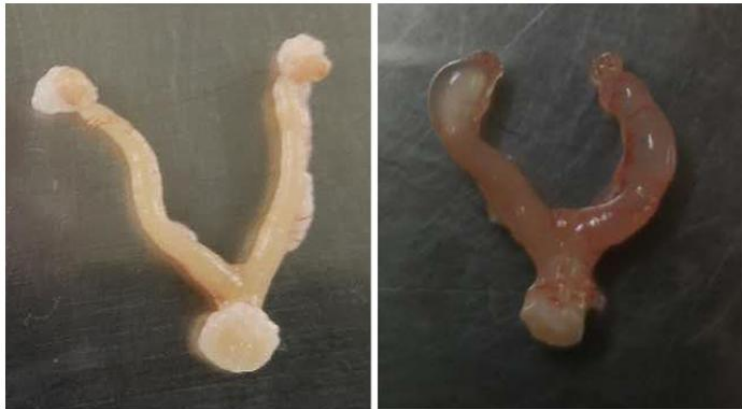

Blank control

Negative control

20

21 **Fig. S1** Photos of uteri morphology changes in mice between the blank and negative control.

22

23

24

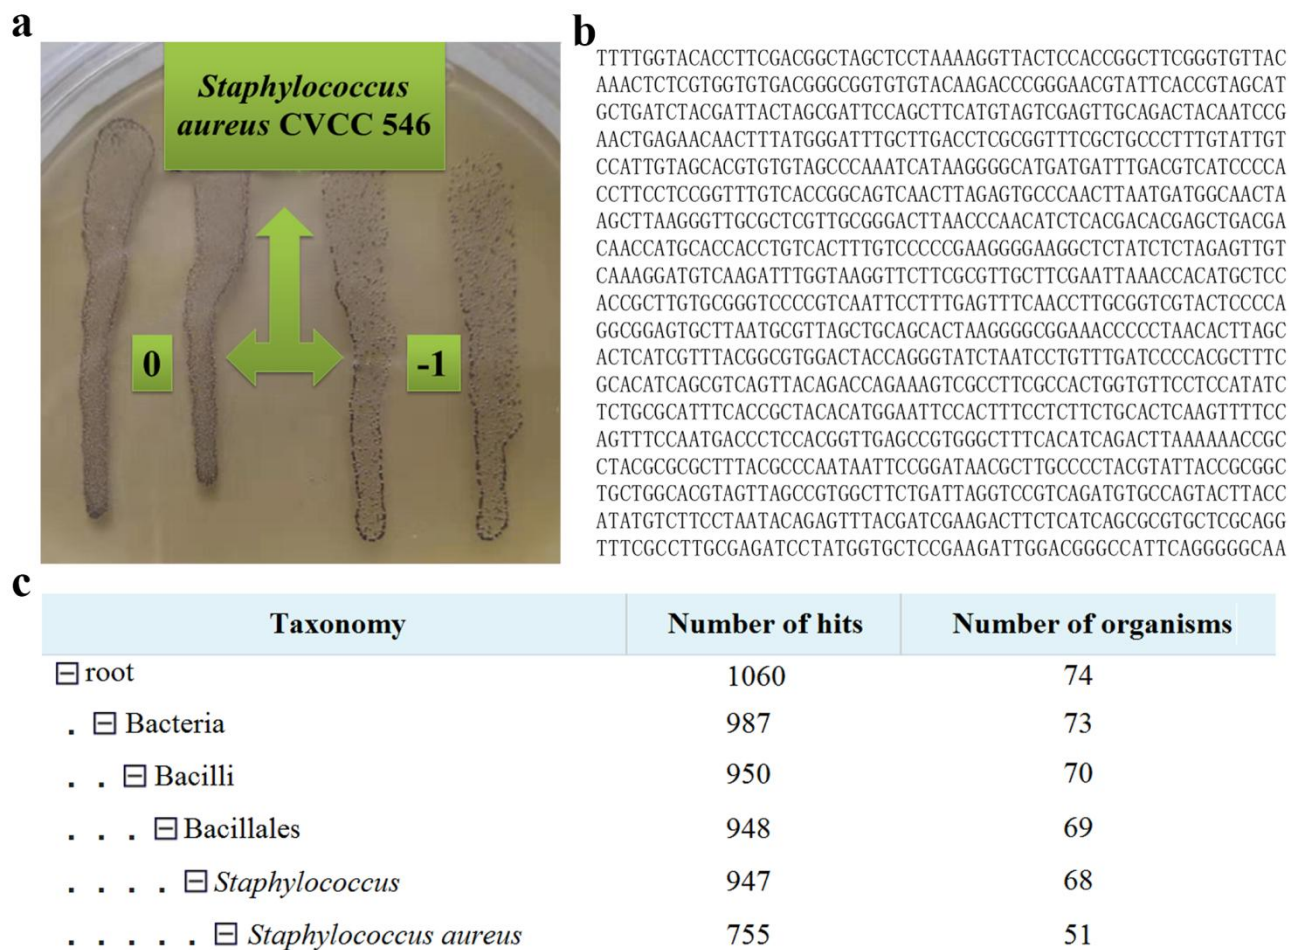

25

26 **Fig. S2** Pathogens isolation and identification. (a) Homogenate of uterus (0) and 10 times dilutions (-1) were dropped on  
 27 BP agar supplemented with potassium tellurite egg-yolk reagent for *S. aureus* CVCC 546. (b) 16S rRNA gene sequence  
 28 of *S. aureus* CVCC 546. (c) The taxonomy report of *S. aureus* CVCC 546 via 16S rRNA gene sequence BLAST on  
 29 NCBI (<https://blast.ncbi.nlm.nih.gov/Blast.cgi>).

30

31 **Supplementary Tables**32 **Table S1.** Selected DEGs of ID13 treated-*S. aureus* CVCC546 related to membrane potential.

| <b>Gene name</b> | <b>Gene product</b>                           | <b>log2.fold change</b> | <b>qvalue</b> | <b>Protein type</b>       |
|------------------|-----------------------------------------------|-------------------------|---------------|---------------------------|
| <i>mnhA</i>      | Na(+)/H(+) antiporter subunit A1              | -1.6                    | 7.3E-194      |                           |
| <i>mnhB</i>      | Na(+)/H(+) antiporter subunit B1              | -1.5                    | 2.2E-13       |                           |
| <i>mnhC</i>      | Na(+)/H(+) antiporter subunit C1              | -1.6                    | 2.3E-10       |                           |
| <i>mnhD</i>      | Na(+)/H(+) antiporter subunit D1              | -1.5                    | 1.3E-100      |                           |
| <i>mnhE</i>      | Na(+)/H(+) antiporter subunit E1              | -1.1                    | 5.3E-16       |                           |
| <i>mnhF</i>      | Na(+)/H(+) antiporter subunit F1              | -1.8                    | 9.2E-04       |                           |
| <i>fabD</i>      | Malonyl CoA-acyl carrier protein transacylase | -1.0                    | 6.2E-40       |                           |
| <i>ebh</i>       | Extracellular matrix-binding protein ebh      | 2.2                     | 1.3E-03       |                           |
| <i>mtlA</i>      | PTS system mannitol-specific EIICB component  | 1.8                     | 8.0E-04       | ion binding and transport |
| <i>sdrC</i>      | Serine-aspartate repeat-containing protein C  | 3.6                     | 1.2E-03       |                           |
| <i>sdrD</i>      | Serine-aspartate repeat-containing protein D  | 6.2                     | 3.7E-21       |                           |
| <i>sdrE</i>      | Serine-aspartate repeat-containing protein E  | 2.5                     | 5.8E-11       |                           |
| <i>copA</i>      | Copper-exporting P-type ATPase A              | 1.4                     | 2.2E-19       |                           |
| <i>hutG</i>      | Formimidoylglutamase                          | 2.1                     | 5.7E-34       |                           |
| <i>zinT</i>      | Zinc-binding lipoprotein                      | 1.7                     | 6.0E-05       |                           |
| <i>lytM</i>      | Glycyl-glycine endopeptidase                  | -3.2                    | 6.2E-72       |                           |
| <i>ureF</i>      | Urease accessory protein UreF                 | -1.3                    | 2.9E-03       |                           |
| <i>ipdC</i>      | Indole-3-pyruvate decarboxylase               | -1.4                    | 0.0E+00       |                           |
| <i>nreB</i>      | Oxygen sensor histidine kinase NreB           | 1.7                     | 3.8E-04       |                           |
| <i>ftnA</i>      | Bacterial non-heme ferritin                   | 1.3                     | 7.5E-11       |                           |
| <i>narG</i>      | Nitrate reductase alpha chain                 | 6.2                     | 1.2E-87       |                           |
| <i>narH</i>      | Nitrate reductase beta chain                  | 6.0                     | 2.5E-21       |                           |
| <i>narT</i>      | Probable nitrate transporter NarT             | 7.8                     | 1.2E-94       |                           |
| <i>nasD</i>      | Nitrite reductase [NAD(P)H]                   | 5.2                     | 5.8E-46       |                           |
| <i>pflA</i>      | Pyruvate formate-lyase-activating enzyme      | 4.2                     | 5.5E-209      |                           |
| <i>pflB</i>      | Formate acetyltransferase                     | 4.1                     | 0.0E+00       |                           |
| <i>trxA</i>      | Thioredoxin                                   | -1.3                    | 0.0E+00       | energy metabolism         |
| <i>trxB</i>      | Thioredoxin reductase                         | -1.5                    | 2.4E-12       |                           |
| <i>glpD</i>      | Aerobic glycerol-3-phosphate dehydrogenase    | -3.6                    | 0.0E+00       |                           |
| <i>AdhI</i>      | Alcohol dehydrogenase                         | 5.6                     | 2.1E-196      |                           |
| <i>ldhA</i>      | L-lactate dehydrogenase                       | 3.3                     | 8.4E-125      |                           |
| <i>ldhB</i>      | L-lactate dehydrogenase                       | 2.0                     | 3.1E-11       |                           |
| <i>natA</i>      | ABC transporter ATP-binding protein           | 3.9                     | 3.2E-121      |                           |
| <i>fda</i>       | Fructose-bisphosphate aldolase class 1        | -1.6                    | 0.0E+00       |                           |
| <i>pgk</i>       | Phosphoglycerate kinase                       | -2.3                    | 0.0E+00       |                           |
| <i>eno</i>       | Enolase                                       | -1.4                    | 0.0E+00       |                           |

33

34

35 **Table S2.** Selected DEGs of ID13 treated-*S. aureus* CVCC546 related to infections.

| <b>Gene name</b> | <b>Gene product</b>                             | <b>log2.fold change</b> | <b>qvalue</b> | <b>Protein type</b>                    |
|------------------|-------------------------------------------------|-------------------------|---------------|----------------------------------------|
| <i>clfB</i>      | Clumping factor B                               | 2.1                     | 1.5E-12       |                                        |
| <i>fnbA</i>      | Fibronectin-binding protein A                   | -1.9                    | 3.9E-03       |                                        |
| <i>eno</i>       | Enolase                                         | -1.4                    | 0.0E+00       |                                        |
| <i>spa</i>       | Immunoglobulin G-binding protein A              | 5.8                     | 0.0E+00       |                                        |
| <i>agrA</i>      | Accessory gene regulator protein A              | 2.2                     | 5.1E-208      |                                        |
| <i>agrB</i>      | Accessory gene regulator protein B              | 2.7                     | 0.0E+00       |                                        |
| <i>agrC</i>      | Accessory gene regulator protein C              | 1.8                     | 1.1E-119      |                                        |
| <i>sdrC</i>      | Serine-aspartate repeat-containing protein C    | 3.6                     | 1.2E-03       | Colonization factors and toxins        |
| <i>sdrD</i>      | Serine-aspartate repeat-containing protein D    | 6.2                     | 3.7E-21       |                                        |
| <i>sdrE</i>      | Serine-aspartate repeat-containing protein E    | 2.5                     | 5.8E-11       |                                        |
| <i>ebh</i>       | Extracellular matrix-binding protein ebh        | 2.2                     | 1.3E-03       |                                        |
| <i>sarA</i>      | Transcriptional regulator SarA                  | 1.2                     | 5.2E-32       |                                        |
| <i>sarS</i>      | HTH-type transcriptional regulator SarS         | 3.2                     | 2.2E-73       |                                        |
| <i>sarV</i>      | HTH-type transcriptional regulator SarV         | 2.9                     | 1.1E-36       |                                        |
| <i>sar1418</i>   | TelA-like protein SAR1418                       | -1.4                    | 6.2E-105      |                                        |
| <i>sar0193</i>   | PTS system EIIBC component SAR0193              | 2.9                     | 2.4E-47       |                                        |
| <i>secA</i>      | Protein translocase subunit SecA                | 1.3                     | 4.5E-07       |                                        |
| <i>hly</i>       | Alpha-hemolysin                                 | 4.7                     | 0.0E+00       |                                        |
| <i>cidA</i>      | Holin-like protein CidA                         | -4.2                    | 6.2E-10       |                                        |
| <i>cidB</i>      | Holin-like protein CidB                         | 2.7                     | 6.1E-167      |                                        |
| <i>lrgB</i>      | Antiholin-like protein LrgB                     | 2.5                     | 1.5E-06       |                                        |
| <i>lytR</i>      | Transcriptional regulator LytR                  | -1.3                    | 4.0E-193      |                                        |
| <i>lytM</i>      | Glycyl-glycine endopeptidase LytM               | -3.2                    | 6.2E-72       |                                        |
| <i>capA</i>      | Capsular polysaccharide synthesis protein cap5A | -2.8                    | 5.4E-63       | Autolysis and biofilm-related proteins |
| <i>capB</i>      | Putative tyrosine-protein kinase CapB           | -3.5                    | 1.1E-20       |                                        |
| <i>capC</i>      | Putative tyrosine-protein phosphatase CapC      | -3.5                    | 4.1E-38       |                                        |
| <i>capD</i>      | UDP-glucose 4-epimerase                         | -2.6                    | 6.7E-28       |                                        |
| <i>capG</i>      | UDP-N-acetylglucosamine 2-epimerase             | -3.5                    | 3.2E-50       |                                        |
| <i>capL</i>      | Probable glycosyltransferase                    | -3.6                    | 2.5E-47       |                                        |
| <i>capM</i>      | Uncharacterized sugar transferase               | -2.3                    | 5.2E-14       |                                        |
| <i>capN</i>      | UDP-glucose 4-epimerase                         | -2.9                    | 5.3E-28       |                                        |

36

37

38 **Table S3.** Changes of different white blood cells in mice between negative and blank control (n=5).

| <b>Group</b>          | <b>WBC<sup>a</sup><br/>(10<sup>9</sup> cell/L)</b> | <b>NEU<sup>b</sup><br/>(10<sup>9</sup> cell/L)</b> | <b>LYM<sup>c</sup><br/>(10<sup>9</sup> cell/L)</b> | <b>NEUT%</b>  | <b>LYM%</b>    |
|-----------------------|----------------------------------------------------|----------------------------------------------------|----------------------------------------------------|---------------|----------------|
| <b>BC<sup>d</sup></b> | 5.14±1.22                                          | 2.24±0.34                                          | 2.03±0.40                                          | 47.80±5.13    | 39.73±1.75     |
| <b>NC<sup>e</sup></b> | 14.56±3.00**                                       | 9.65±2.00***                                       | 3.25±0.83*                                         | 66.24±1.51*** | 22.24±2.33**** |

39 <sup>a</sup>WBC: white blood cells; <sup>b</sup>NEU: neutrophils; <sup>c</sup>LYM: lymphocytes; <sup>d</sup> BC: blank control; <sup>e</sup>NC: negative control, \*p<0.05,

40 \*\*p<0.01, \*\*\*p<0.001, \*\*\*\*p<0.0001.

41
